# Supplementary material for: Nitrogen-doped graphene guided formation of monodisperse microspheres of LiFePO4 nanoplates as the positive electrode material of lithium-ion batteries
Source: Royal Society of Chemistry journal article supplement (doi:10.1039/c6ta03440c), 2016-01-01
Supplement: c6ta03440c1.pdf [file c6ta03440c1.pdf]

# **Nitrogen-doped graphene guided formation of monodisperse microspheres of $\text{LiFePO}_4$ nanoplates as the positive electrode material of lithium-ion batteries**

Yingke Zhou<sup>a,\*</sup>, Jiming Lu<sup>a</sup>, Chengji Deng<sup>a</sup>, Hongxi Zhu<sup>a</sup>, George Z. Chen<sup>a,b</sup>, Shaowei Zhang<sup>a</sup>, Xiaohui Tian<sup>a</sup>

<sup>a</sup>*The State Key Laboratory of Refractories and Metallurgy, College of Materials and Metallurgy, Wuhan University of Science and Technology, Wuhan 430081, P. R.*

<sup>b</sup>*Department of Chemical and Environmental Engineering, Faculty of Engineering, University of Nottingham, Nottingham NG7 2RD, UK.*

---

\* Corresponding author. Tel.: +86 2768 862928, Fax: +86 2768 862928. E-mail: [zhouyk888@hotmail.com](mailto:zhouyk888@hotmail.com).

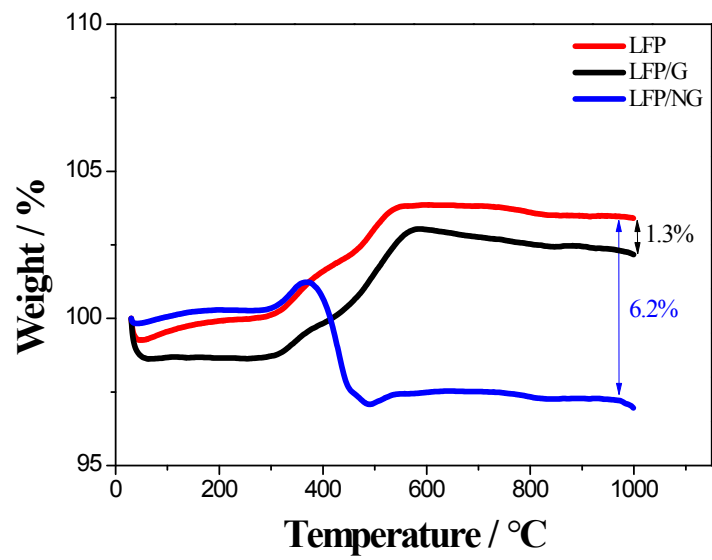

**Fig. S1** TGA curves of LFP, LFP/G and LFP/NG.

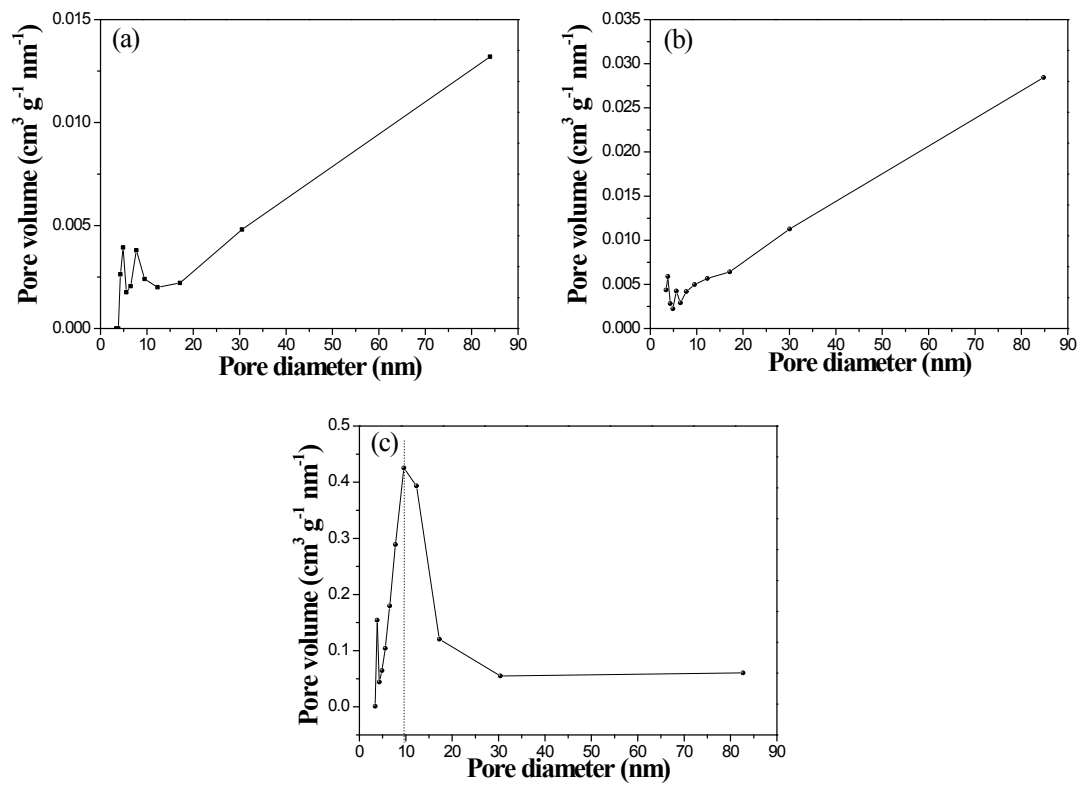

**Fig. S2** Pore-size distributions of (a) LFP, (b) LFP/G and (c) LFP/NG.

**Table S1** Summary of the fitting results of LFP, LFP/G and LFP/NG from XPS.

| Samples       | C functional groups / (BE.eV) |                |                |                |                | N functional groups / (BE.eV) |                |                |
|---------------|-------------------------------|----------------|----------------|----------------|----------------|-------------------------------|----------------|----------------|
|               | C <sub>1</sub>                | C <sub>2</sub> | C <sub>3</sub> | C <sub>4</sub> | C <sub>5</sub> | N <sub>1</sub>                | N <sub>2</sub> | N <sub>3</sub> |
|               | 284.6                         | 285.9          | 286.5          | 287.9          | 289            | 398.3                         | 399.4          | 401.1          |
| <b>LFP</b>    | 71.24                         | -              | 24.25          | 0.59           | 3.92           | -                             | -              | -              |
| <b>LFP/G</b>  | 72.56                         | -              | 11.97          | 13.71          | 1.77           | -                             | -              | -              |
| <b>LFP/NG</b> | 66.34                         | 12.38          | 10.27          | 4.53           | 6.47           | 27.26                         | 36.12          | 36.62          |

  

| Samples       | O functional groups / (BE.eV) |                |                |                | Fe species / (BE.eV) |                 |                 |                 |
|---------------|-------------------------------|----------------|----------------|----------------|----------------------|-----------------|-----------------|-----------------|
|               | O <sub>1</sub>                | O <sub>2</sub> | O <sub>3</sub> | O <sub>4</sub> | Fe <sub>1</sub>      | Fe <sub>2</sub> | Fe <sub>3</sub> | Fe <sub>4</sub> |
|               | 530.9                         | 531.5          | 532.6          | 533.8          | 709.9                | 713.5           | 723             | 727             |
| <b>LFP</b>    | 56.89                         | 32.96          | 7.49           | 2.66           | 60.13                | 10.41           | 24.11           | 5.35            |
| <b>LFP/G</b>  | 65.27                         | 21.1           | 7.58           | 6.05           | 48.06                | 20.44           | 22.05           | 9.44            |
| <b>LFP/NG</b> | 82.48                         | 14.79          | 0              | 2.73           | 52.19                | 18.19           | 23.15           | 6.46            |

*Notes.* C<sub>1</sub>: C-C; C<sub>2</sub>: C-N; C<sub>3</sub>: C-O; C<sub>4</sub>: C=O; C<sub>5</sub>: O-C=O. O<sub>1</sub>: O-P; O<sub>2</sub>: O-C; O<sub>3</sub>: C=O; O<sub>4</sub>: O-C=O.  
N<sub>1</sub>: Pyridinic N; N<sub>2</sub>: Amino N; N<sub>3</sub>: Graphitic N; Fe<sub>1</sub>: Fe 2p<sub>3/2</sub>; Fe<sub>2</sub>: Fe 2p<sub>3/2</sub> satellite peak; Fe<sub>3</sub>: Fe 2p<sub>1/2</sub>; Fe<sub>4</sub>: Fe 2p<sub>1/2</sub> satellite peak.

**Table S2** Summary of the EIS fitted parameters, Li<sup>+</sup> diffusion coefficient and Warburg factor of the samples.

| Samples | Fitted parameters    |                      |                      |                            |                                        |
|---------|----------------------|----------------------|----------------------|----------------------------|----------------------------------------|
|         | R <sub>u</sub> / (Ω) | R <sub>1</sub> / (Ω) | R <sub>2</sub> / (Ω) | σ / (Ω s <sup>-1/2</sup> ) | D / (cm <sup>2</sup> s <sup>-1</sup> ) |
| LFP     | 9.8                  | 112.3                | 458.2                | 62.4                       | 6.25×10 <sup>-14</sup>                 |
| LFP/G   | 7.9                  | 42.8                 | 239.5                | 25.5                       | 3.75×10 <sup>-13</sup>                 |
| LFP/NG  | 6.6                  | 6.7                  | 91.2                 | 24.8                       | 3.99×10 <sup>-13</sup>                 |
